# Supplementary material for: Enhanced Mechanical and Thermal Properties of Polyimide Films Using Hydrophobic Fumed Silica Fillers
Source: MDPI journal article supplement (doi:10.3390/polym16020297), 2024-01-22
Supplement: s1 [file s1]

# Supporting Information

## Enhanced Mechanical and Thermal Properties of Polyimide Films Using Hydrophobic Fumed Silica Fillers

Jongin Yeob<sup>1,2</sup>, Sung Woo Hong<sup>2</sup>, Won-Gun Koh<sup>1,\*</sup> and In Park<sup>2,3,\*</sup>

<sup>1</sup> Department of Chemical and Biomolecular Engineering, Yonsei University, 50 Yonsei-ro Seodaemun-gu, Seoul 03722, Republic of Korea

<sup>2</sup> Research Institute of Clean Manufacturing System, Korea Institute of Industrial Technology (KITECH), 89 Yangdaegiro-gil, Ipjang-myeon, Seobuk-gu, Cheonan-si, Chungnam 31056, Republic of Korea; [yeopji9595@kitech.re.kr](mailto:yeopji9595@kitech.re.kr) (J.Y.)

<sup>3</sup> KITECH School, University of Science and Technology (UST), 176 Gajeong-dong, Yuseong-gu, Daejeon 34113, Republic of Korea

\* Corresponding author: Email address: [wongun@yonsei.ac.kr](mailto:wongun@yonsei.ac.kr) (W.G.K.), [inpark@kitech.re.kr](mailto:inpark@kitech.re.kr) (I.P.)

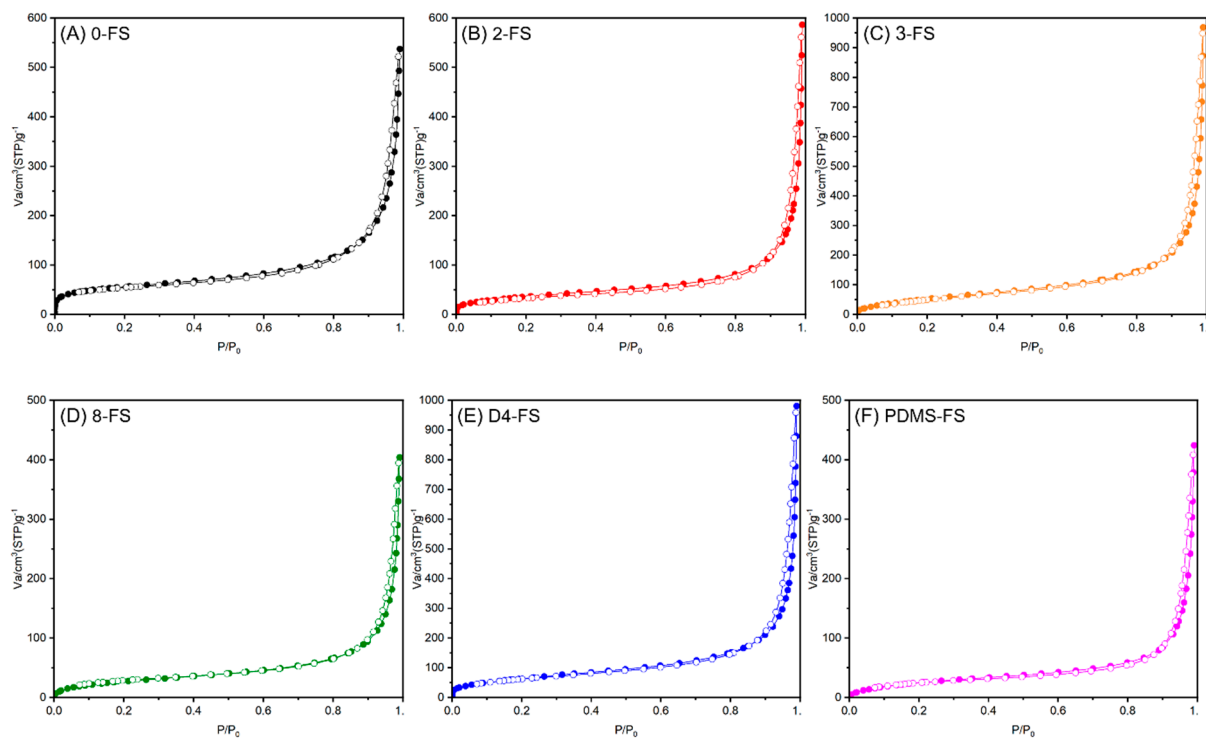

**Figure S1.** N<sub>2</sub> adsorption-desorption isotherms of FS nanoparticles used for PI/FS composite films; (A) 0-, (B) 2-, (C) 3-, (D) 8-, (E) D4-, and (F) PDMS-FS.

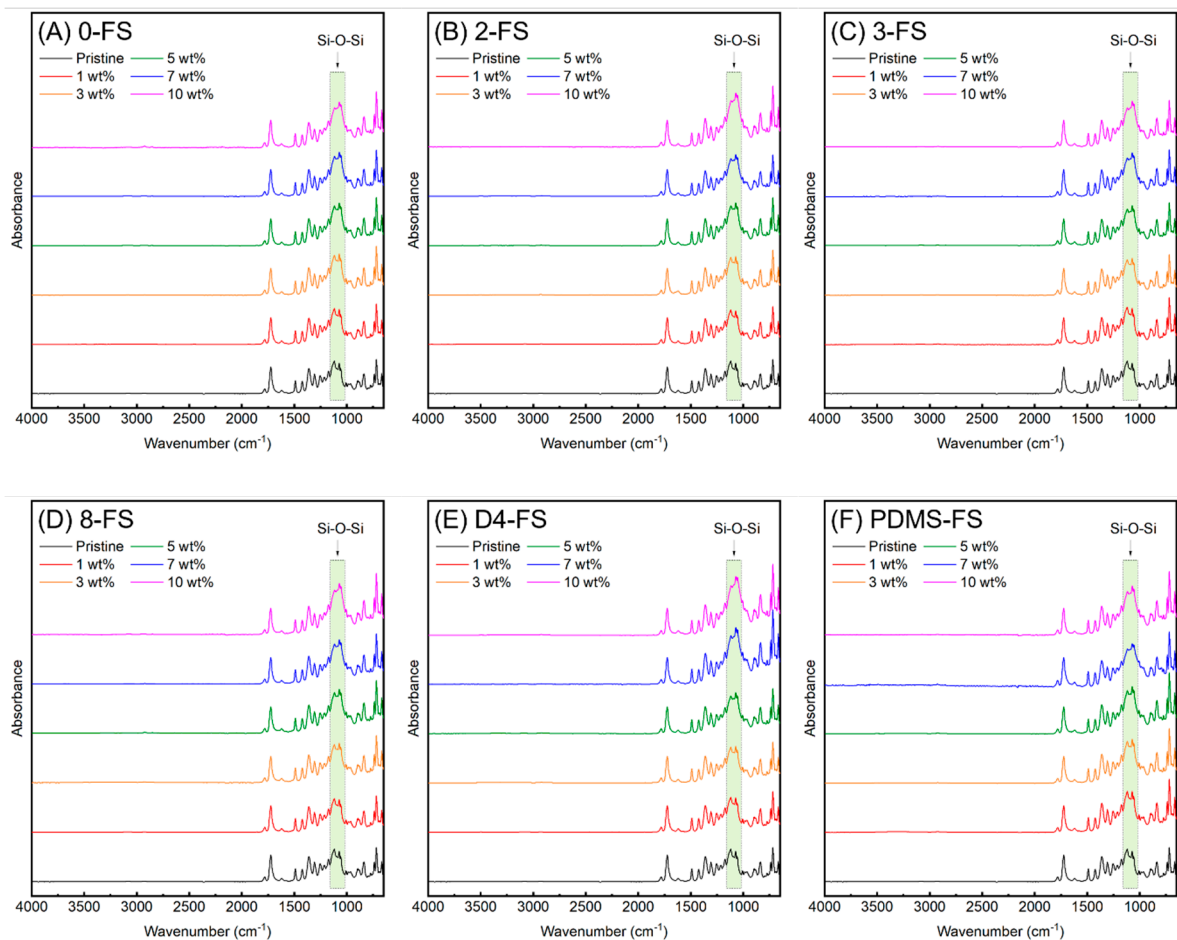

**Figure S2.** FT-IR spectra of the pristine PI and the PI/FS composite film containing (A) 0-, (B) 2-, (C) 3-, (D) 8-, (E) D4-, and (F) PDMS-FS. The FT-IR spectra were normalized based on the intensity of C=O stretching peak ( $1670\text{ cm}^{-1}$ ) for comparison.

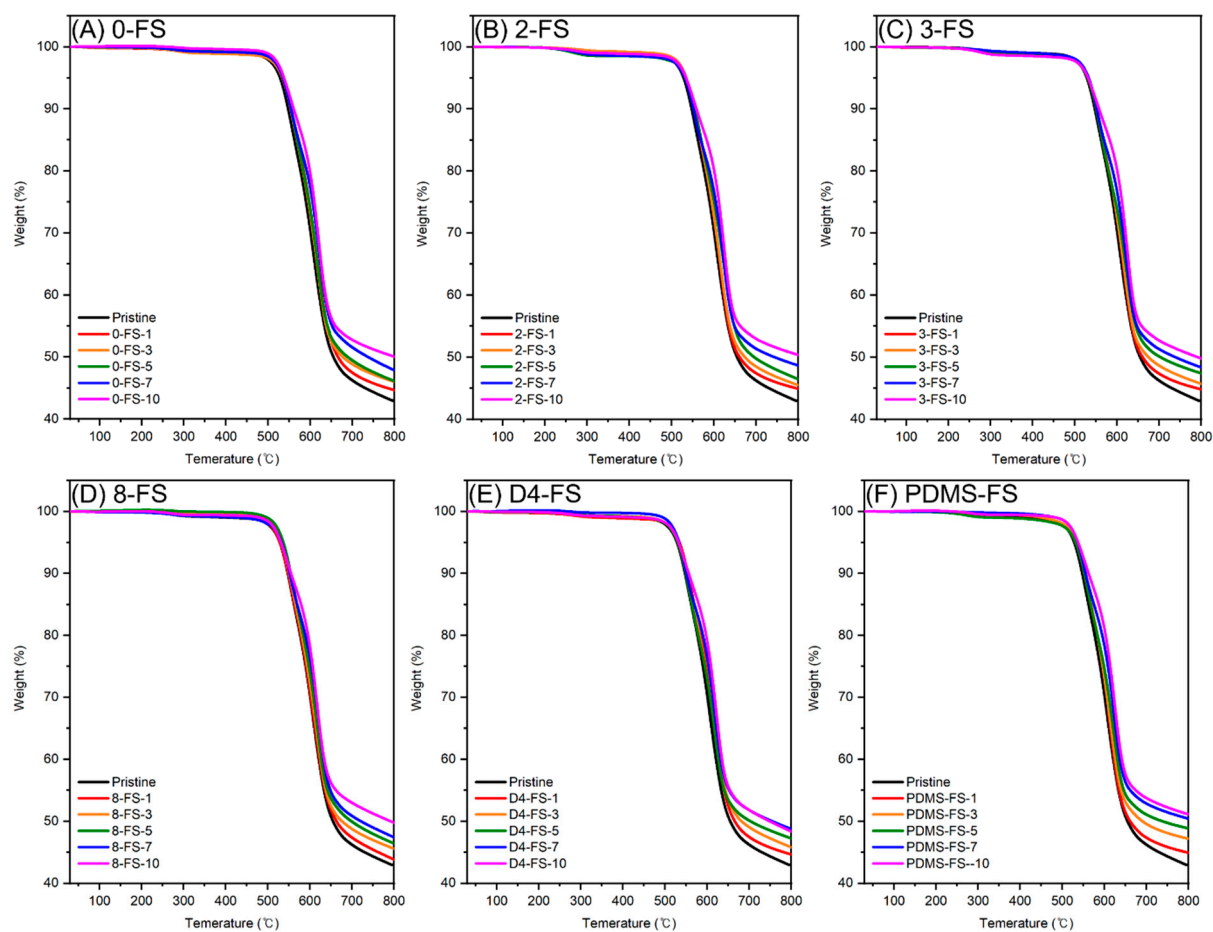

**Figure S3.** TGA curves of the PI/FS composite films containing (A) 0-, (B) 2-, (C) 3-, (D) 8-, (E) D4-, and (F) PDMS-FS.



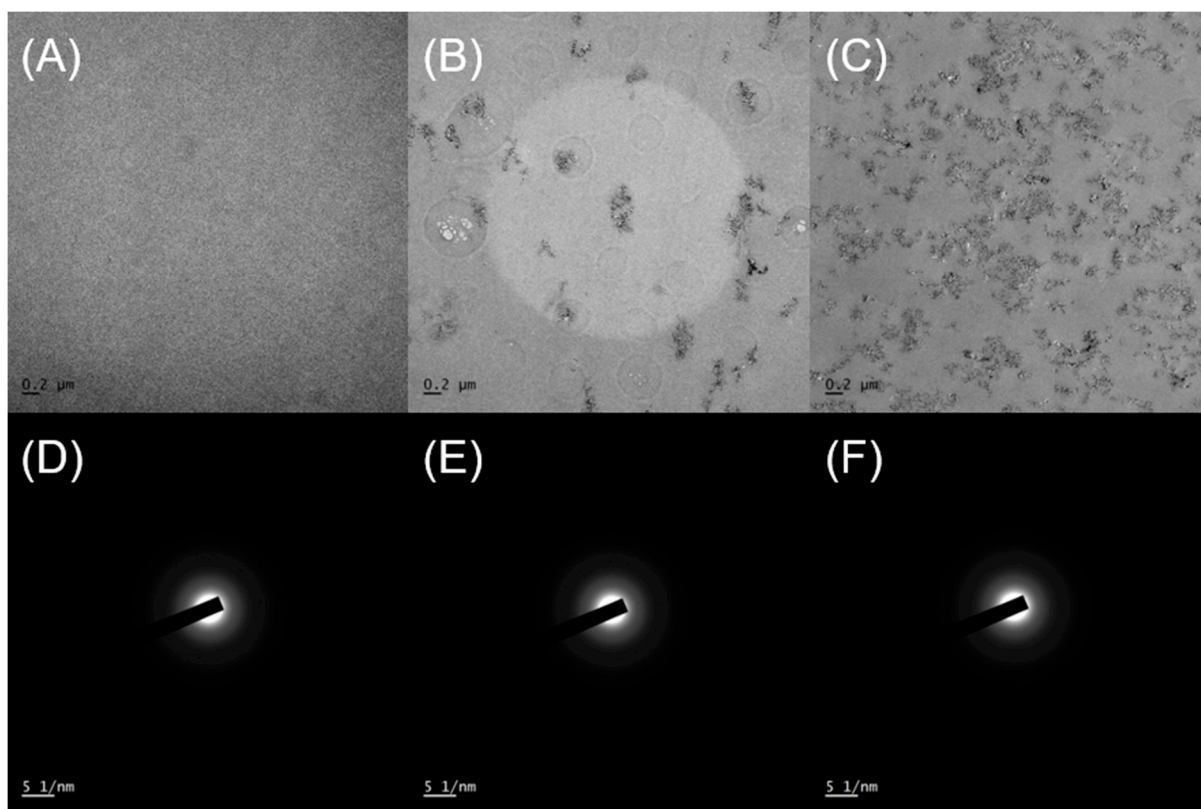

**Figure S4.** TEM images of (A) the pristine, (B) 3-FS-1, and (C) 3-FS-7. (D), (E), and (F) are the corresponding electron diffraction patterns to (A), (B), and (C).

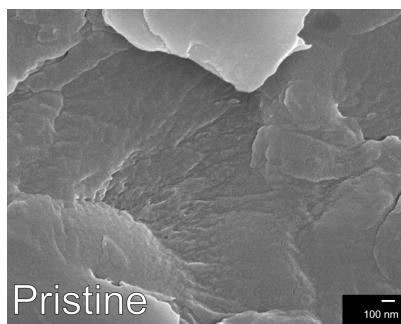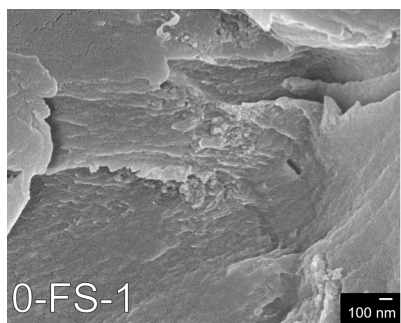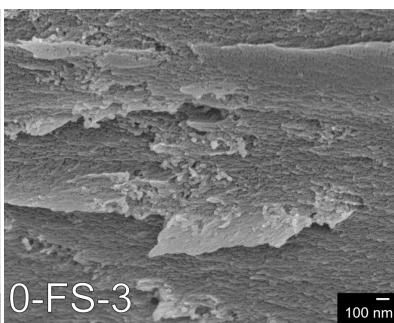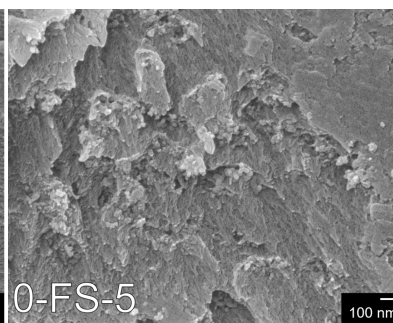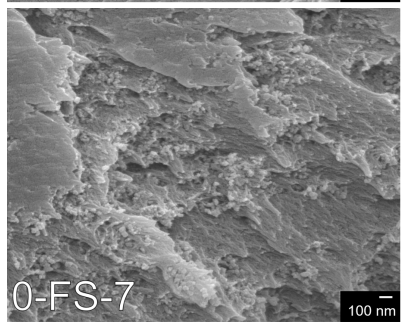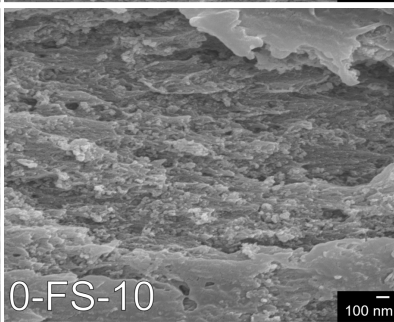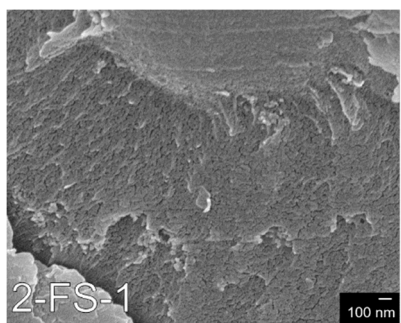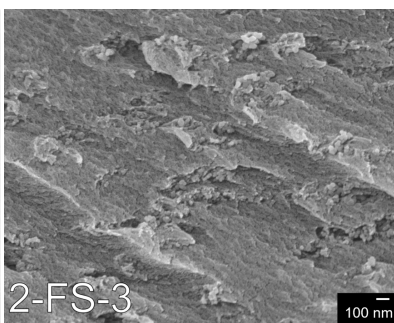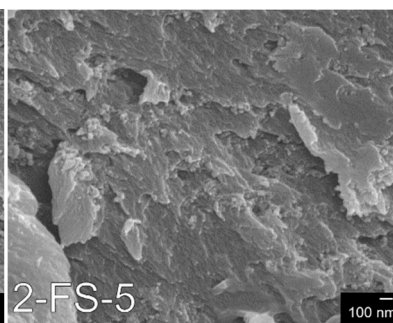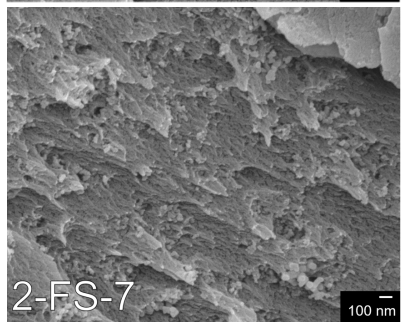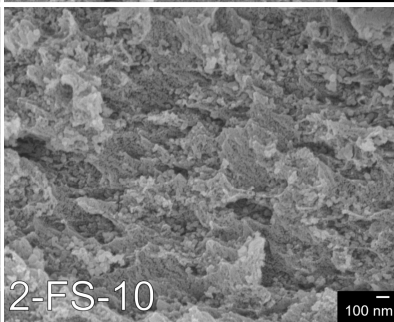

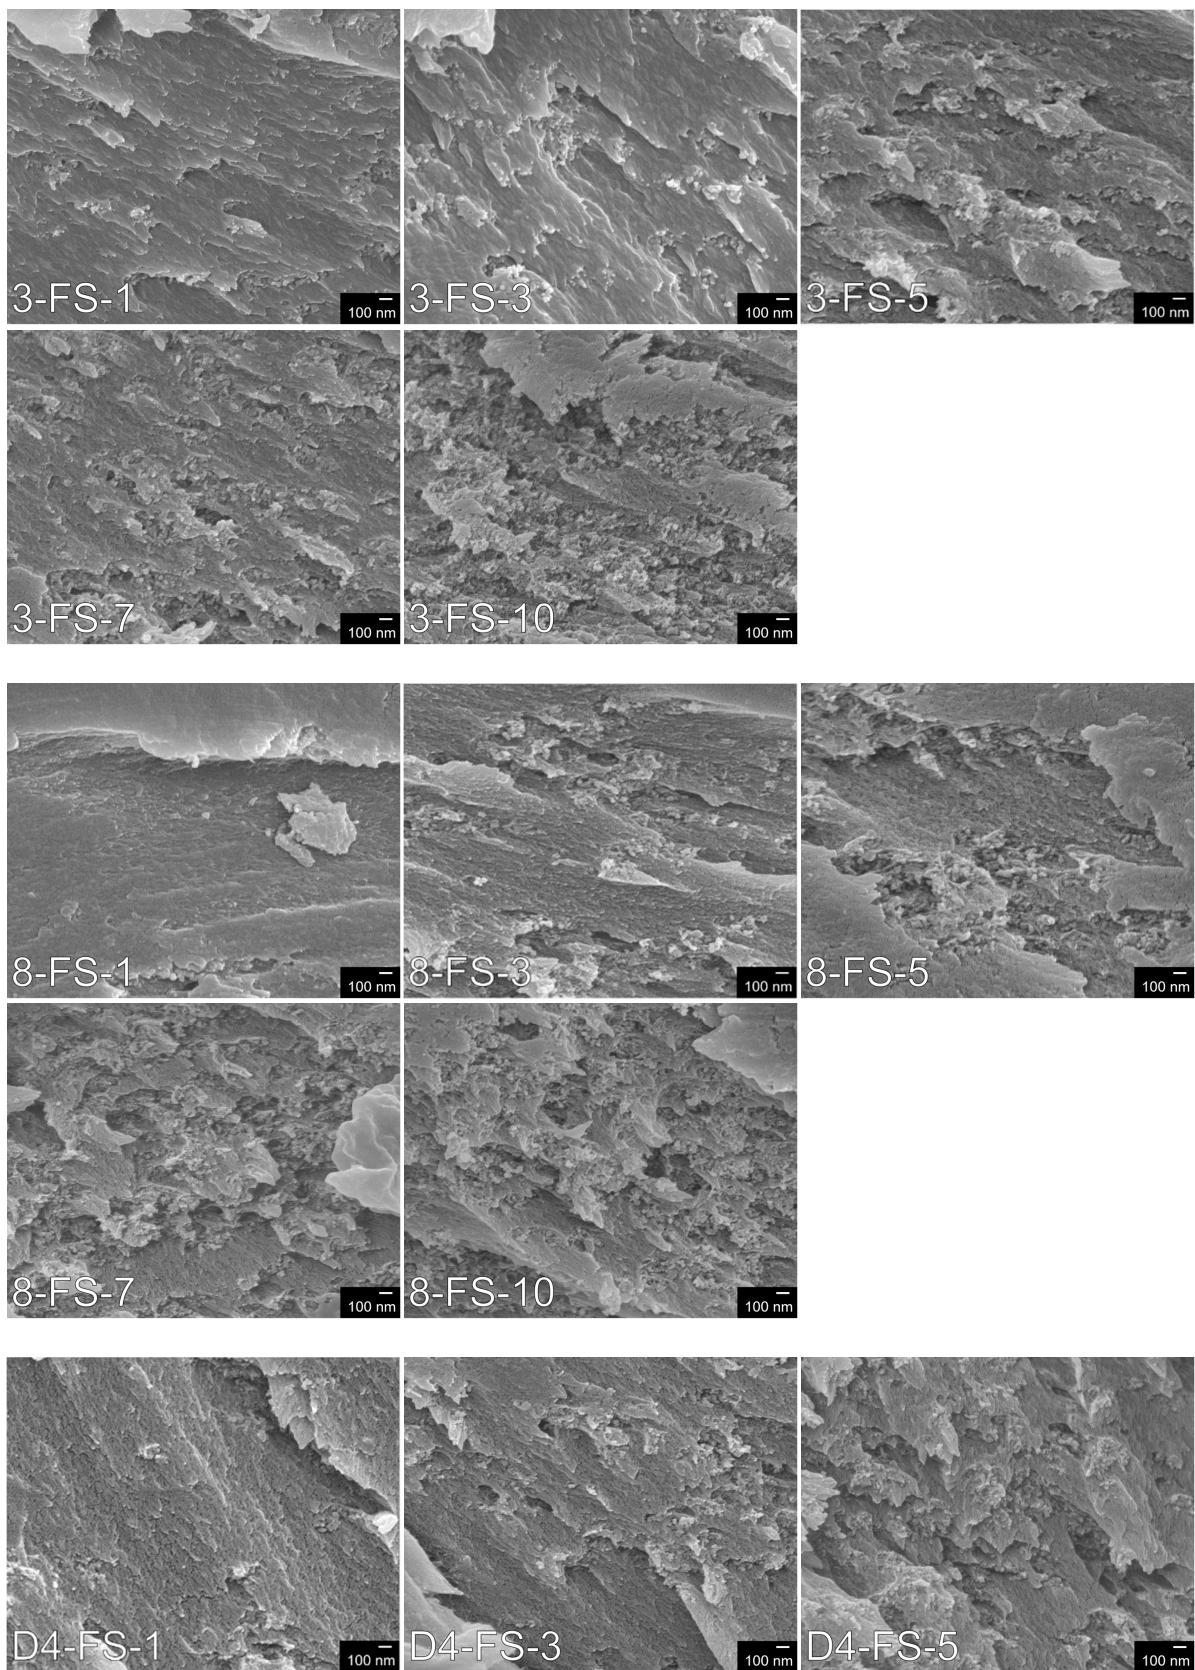



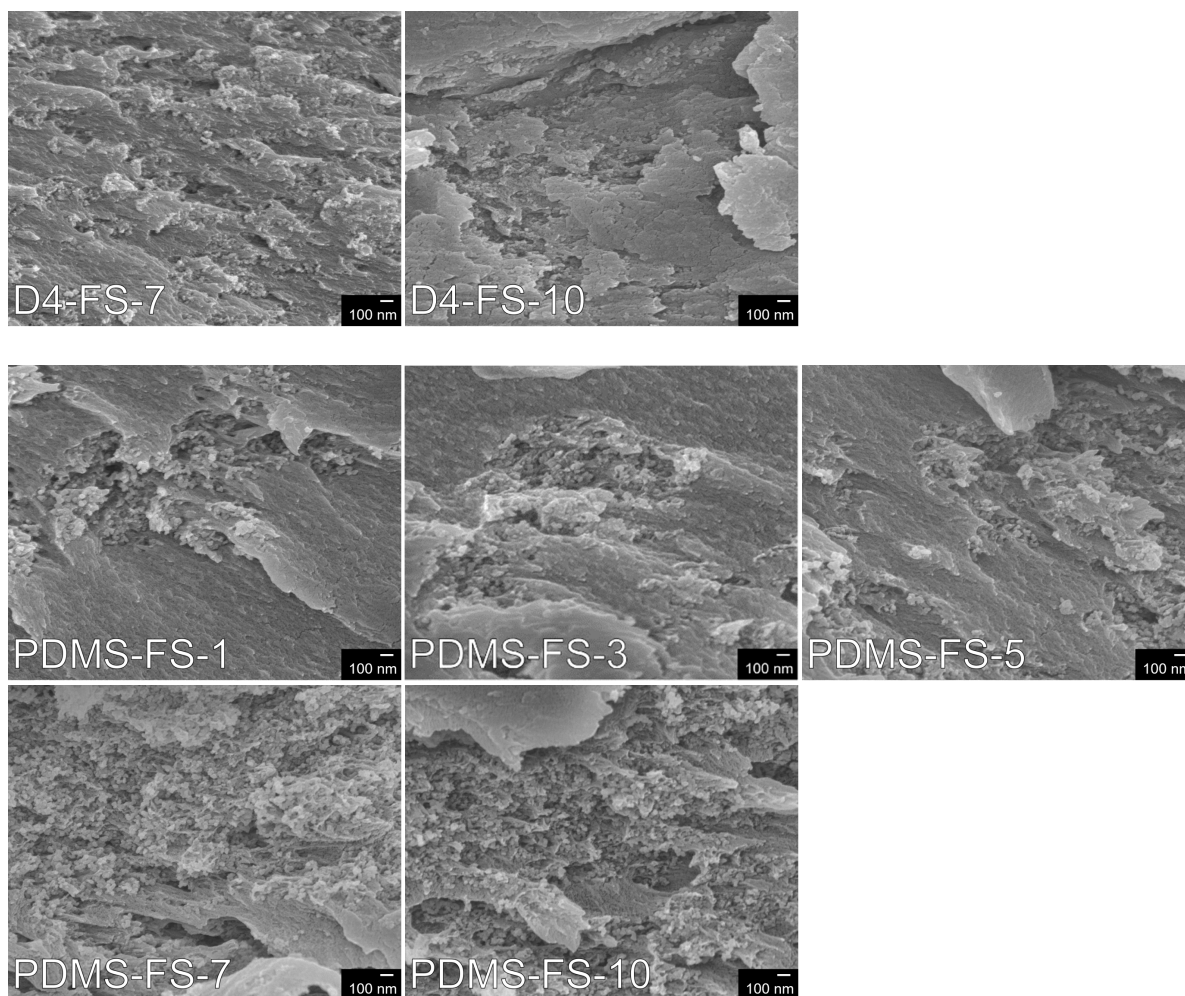

**Figure S5.** Cross-sectional SEM images of PI/FS composite films.

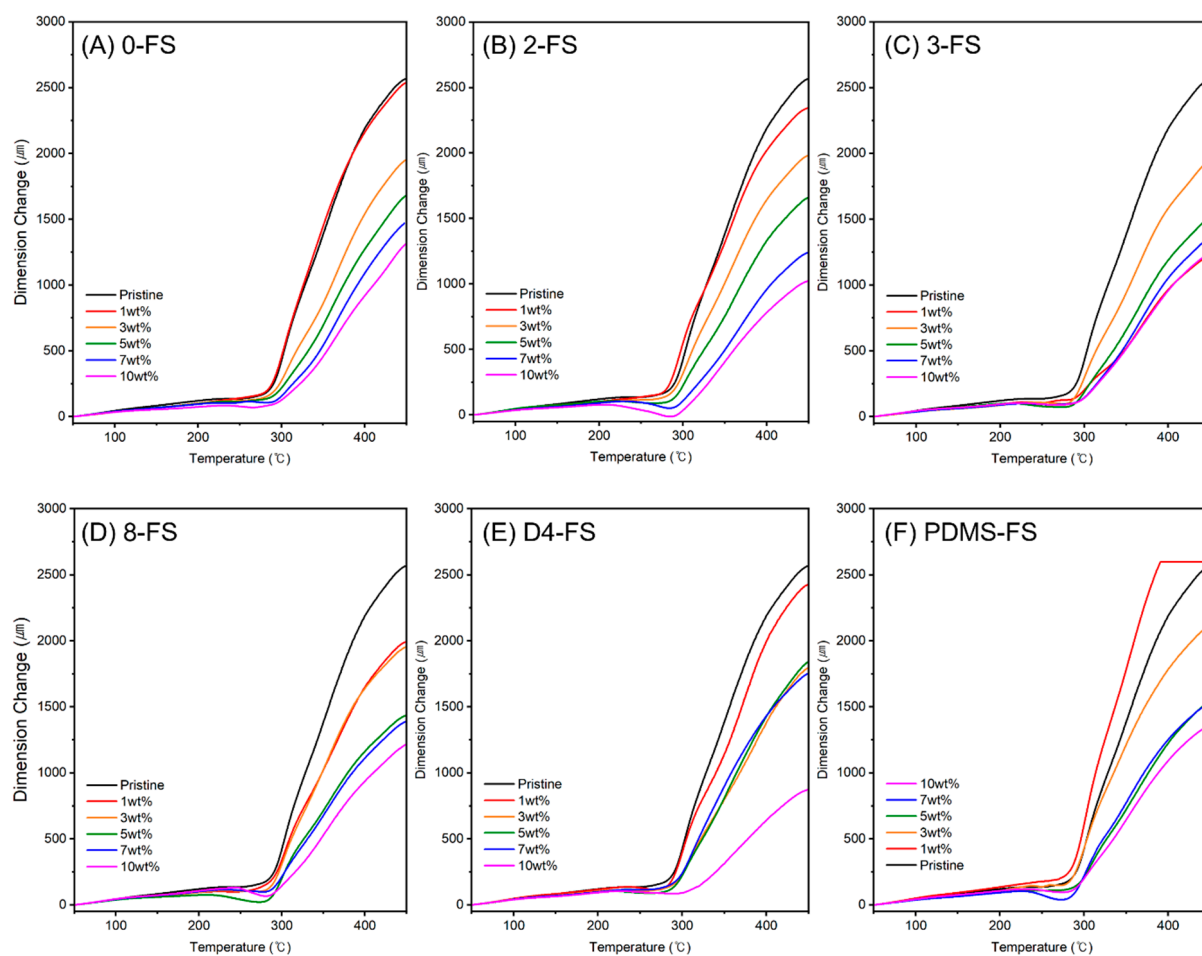

**Figure S6.** TMA curves of the PI/FS composite films containing (A) 0-, (B) 2-, (C) 3-, (D) 8-, (E) D4-, and (F) PDMS-FS.

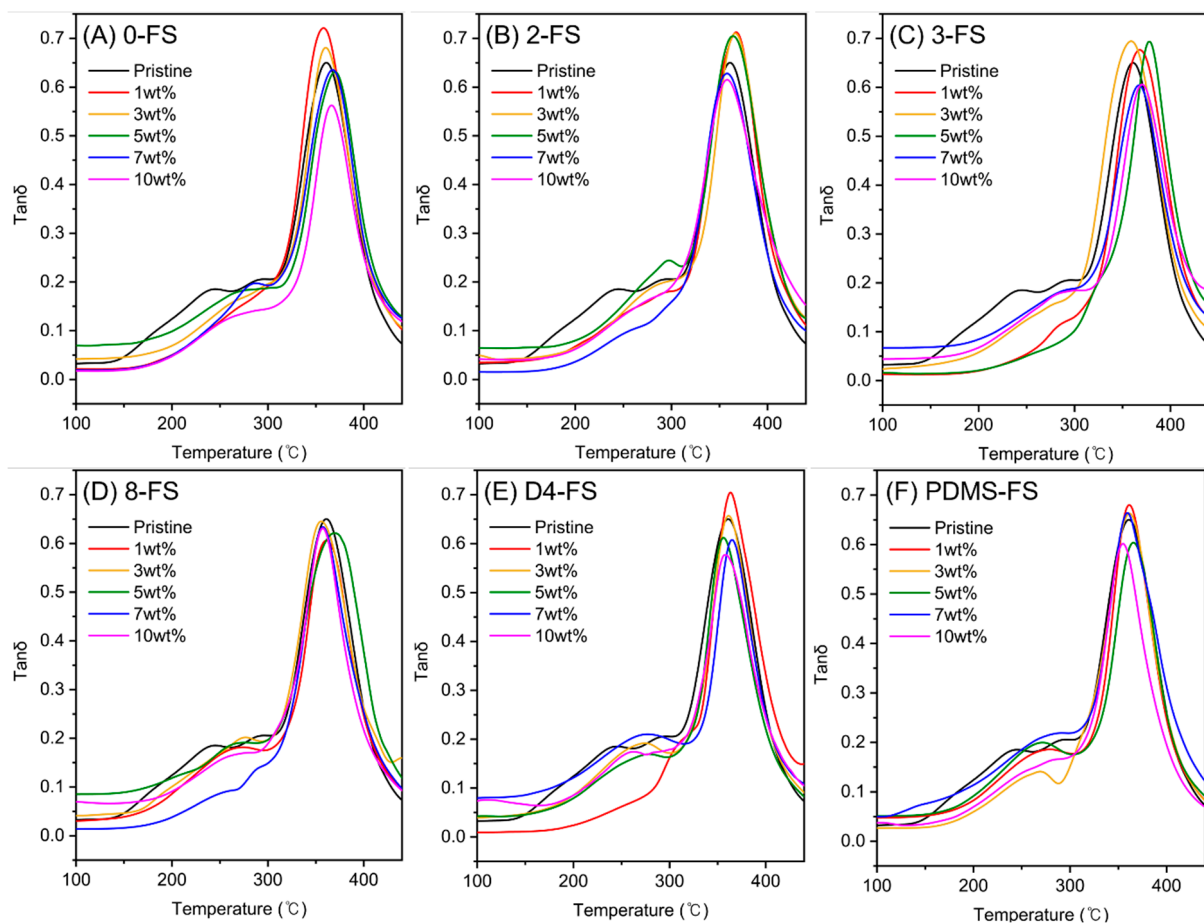

**Figure S7.**  $\tan \delta$  curves of the PI/FS composite films containing (A) 0-, (B) 2-, (C) 3-, (D) 8-, (E) D4-, and (F) PDMS-FS.
